# Supplementary material
Source: publisher figshare collection journal article supplement (https://karger.figshare.com/articles/dataset/_/5047843)
Supplement: Supplementary file 1 [file 1]

**Supplementary Table 1. Association between 25-hydroxyvitamin D and continuous ACR in NHANES 2001-2006**

| Vitamin D<br>(ng/ml) | Percent Difference (95% CI) |               |               |
|----------------------|-----------------------------|---------------|---------------|
|                      | Unadjusted                  | Model 1*      | Model 2*      |
| [0-10)               | -17 (-33, -1)               | +9 (-9, +27)  | +15 (-1, +31) |
| [10-20)              | -10(-19, 0)                 | +7 (-3, +16)  | +10 (0, +20)  |
| [20-30)              | -2 (-13, +8)                | +4 (-5, +13)  | +5 (-4, +15)  |
| [30-40)              | 0 (Reference)               | 0 (Reference) | 0 (Reference) |
| [40-50)              | +14 (-11, +39)              | +13 (-9, +35) | +8 (-16, +33) |
| ≥ 50                 | +8 (-28, +44)               | +9 (-23, +41) | +27 (-7, +61) |
| <i>p</i> -value      | 0.02                        | 0.71          | 0.29          |

ACR is log transformed to correct for the right-sided skew. Effect estimates are expressed as percent differences (from reference) with 95% confidence interval in parentheses. Model 1 is adjusted for age, sex, race/ethnicity, BMI z-score. Model 2 is additionally adjusted for diabetes and hypertension and is thus limited to participants 8-19 years of age for whom systolic and diastolic blood pressures were available.
