# Supplementary material
Source: publisher figshare collection journal article supplement (https://karger.figshare.com/articles/dataset/_/5047843)
Supplement: Supplementary file 2 [file 1]

**Supplementary Table 2. Association between 25-hydroxyvitamin D and continuous ACR in SNAS.**

| Vitamin D<br>(ng/ml) | Percent Difference (95% CI) |                |                |
|----------------------|-----------------------------|----------------|----------------|
|                      | Unadjusted                  | Model 1*       | Model 2*       |
| [0-20)               | +9 (-7, +26)                | +10 (-5, +28)  | +9 (-7, +26)   |
| [20-30)              | +10 (-7, +29)               | +11 (-6, +30)  | +9 (-7, +28)   |
| [30-40)              | 0 (Reference)               | 0 (Reference)  | 0 (Reference)  |
| [40-50)              | +7 (-19, +42)               | +7 (-20, +43)  | +6 (-20, +42)  |
| ≥ 50                 | +16 (-11, +50)              | +11 (-14, +42) | +13 (-13, +47) |
| <i>p</i> -value      | 0.78                        | 0.77           | 0.83           |

ACR is log transformed to correct for the right-sided skew. Effect estimates are expressed as percent differences (from reference) with 95% confidence interval in parentheses. The groups with 25-hydroxyvitamin D less than 20 ng/ml were combined due to small sample numbers in each group. Model 1 was adjusted for age, gender, race and BMI z-score. Model 2 was additionally adjusted for hypertension and hemoglobin A1c. To convert 25-hydroxyvitamin D in ng/ml to nmol/L, multiply by 2.496.
